# Supplementary material
Source: PubMed Central journal article supplement (PMC4414683)
Supplement: NIHMS636271-supplement-Supp_Material.pdf [file NIHMS636271-supplement-Supp_Material.pdf]

**Supplemental Material**  
**Multi-Vendor Implementation and Comparison of Volumetric Whole-Brain Echo-Planar MR Spectroscopic Imaging**

M. Sabati, S. Sheriff, M. Gu, J. Wei, H. Zhu, P. B. Barker, D. M. Spielman, J. R. Alger, A. A. Maudsley

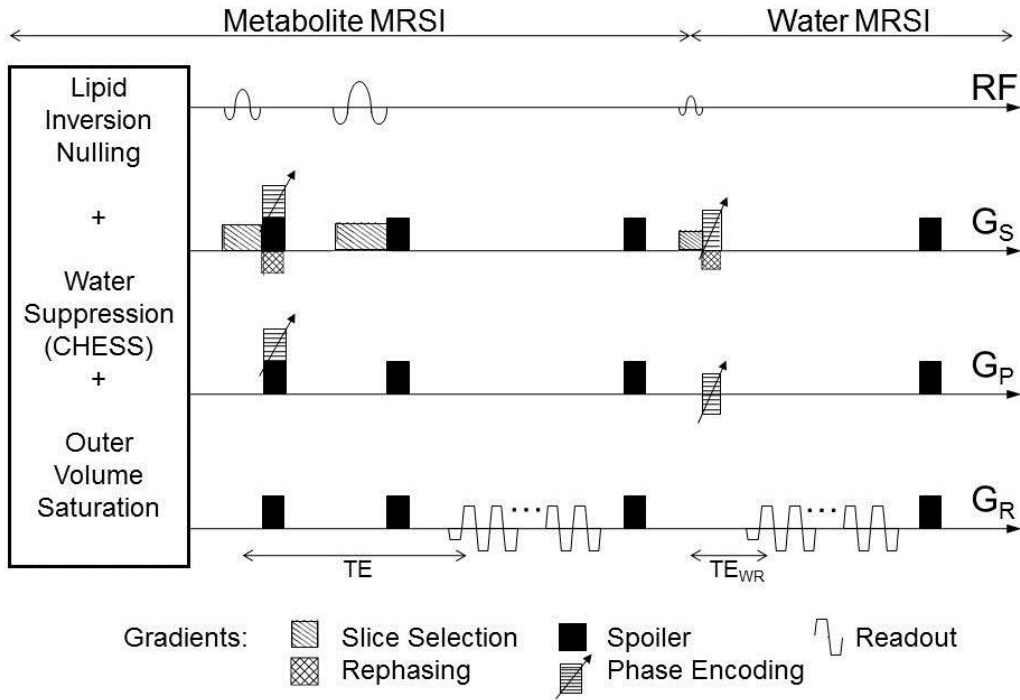

**Figure S1**

Schematic of the volumetric echo planar spectroscopic imaging (EPSI) pulse sequence with interleaved water reference acquisition and preparatory pulses implemented on three different MR instruments. GS, GP, and GR refer to the gradients applied in the selection, phase-encoding, and readout directions.

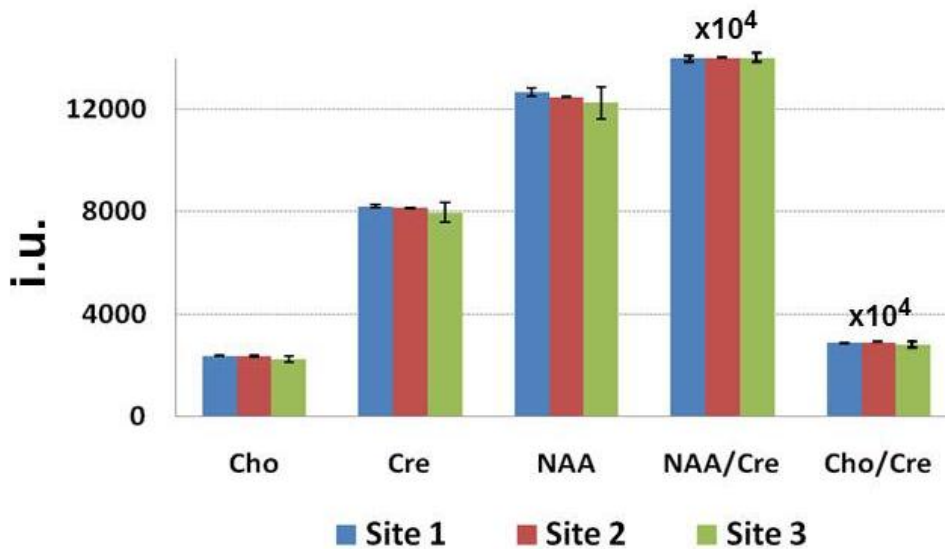

**Figure S2**

Mean individual metabolite concentration values and their ratios obtained for a spectroscopic phantom scanned five times on each MR instrument. Values for the ratio measurements have been scaled by  $10^4$ .

**Table S1**

Spectral quality in terms of fitted volume percentage, volumetric and center-slice uniformities (NAAD) of individual metabolites, and signal-to-noise ratio (SNR) obtained at each Site from a spectroscopic phantom. Values are shown as Mean±standard deviation.

| Site   | Fitted Volume (%) | Volumetric Uniformity |          |          |          | Center-Slice Uniformity |          |          |          | SNR      |
|--------|-------------------|-----------------------|----------|----------|----------|-------------------------|----------|----------|----------|----------|
|        |                   | NAA                   | Cre      | Cho      | SI_Ref   | NAA                     | Cre      | Cho      | SI_Ref   |          |
| Site 1 | 76.5±2.8          | 82.1±2.4              | 79.3±2.8 | 79.4±2.5 | 97.8±1.9 | 87.3±2.0                | 88.7±1.8 | 87.7±2.3 | 98.7±1.4 | 22.5±2.8 |
| Site 2 | 81.7±1.5          | 87.5±1.7              | 86.2±1.9 | 88.6±2.1 | 98.2±1.2 | 90.0±1.9                | 90.1±1.7 | 93.4±1.4 | 98.9±1.2 | 28.0±2.2 |
| Site 3 | 84.3±2.3          | 85.6±2.5              | 84.2±2.0 | 83.0±2.6 | 97.6±1.3 | 92.2±2.1                | 91.1±2.4 | 91.1±1.8 | 98.8±1.5 | 26.7±1.5 |

**Table S2.**

Mean metabolite concentrations corresponding to pure GM and pure WM of each brain region with associated standard deviation (SD) for 10 normal subjects at each site, and ICC calculated for each metabolite at each site. Results are in institutional units and have been scaled by  $10^{-3}$  relative to the values shown in Figure 6. The groups marked with an asterisk are statistically different ( $p < 0.05$ ; one-way ANOVA), and the underlined numbers indicate statistically significant difference between right and left lobes for that brain region.

| Brain regions  | RFL   |      | LFL          |      | RTL   |      | LTL   |      | RPL   |      | LPL          |      | ROL   |      | LOL         |      | Cbl   |      | ICC  |
|----------------|-------|------|--------------|------|-------|------|-------|------|-------|------|--------------|------|-------|------|-------------|------|-------|------|------|
|                | Mean  | SD   | Mean         | SD   | Mean  | SD   | Mean  | SD   | Mean  | SD   | Mean         | SD   | Mean  | SD   | Mean        | SD   | Mean  | SD   |      |
| <b>Pure GM</b> |       |      |              |      |       |      |       |      |       |      |              |      |       |      |             |      |       |      |      |
| <b>NAA</b>     |       |      |              |      |       |      |       |      |       |      |              |      |       |      |             |      |       |      |      |
|                | *     |      | *            |      | *     |      |       |      |       |      |              |      |       |      |             |      |       |      |      |
| <b>Site 1</b>  | 16.07 | 0.86 | <u>14.94</u> | 0.95 | 13.06 | 2.04 | 13.3  | 2.21 | 17.70 | 0.93 | <u>16.24</u> | 1.28 | 13.33 | 2.32 | 13.49       | 2.63 | 13.09 | 1.74 | 0.70 |
| <b>Site 2</b>  | 14.40 | 0.88 | 14.53        | 0.98 | 16.07 | 0.98 | 15.73 | 1.00 | 15.76 | 0.59 | 15.38        | 0.99 | 15.85 | 1.11 | 15.52       | 0.73 | 14.46 | 0.56 | 0.87 |
| <b>Site 3</b>  | 17.39 | 1.40 | 17.90        | 1.32 | 12.34 | 1.40 | 13.46 | 1.29 | 18.83 | 1.49 | 18.70        | 1.68 | 15.18 | 1.79 | 14.26       | 2.16 | 11.47 | 1.39 | 0.72 |
| <b>Cho</b>     |       |      |              |      |       |      |       |      |       |      |              |      |       |      |             |      |       |      |      |
|                |       |      |              |      | *     |      | *     |      | *     |      |              |      |       |      |             |      |       | *    |      |
| <b>Site 1</b>  | 2.44  | 0.30 | 2.21         | 0.27 | 2.06  | 0.45 | 2.05  | 0.46 | 2.04  | 0.29 | 1.86         | 0.31 | 1.40  | 0.53 | 1.60        | 0.35 | 3.18  | 0.69 | 0.73 |
| <b>Site 2</b>  | 2.05  | 0.23 | 2.03         | 0.27 | 1.99  | 0.25 | 2.09  | 0.27 | 1.59  | 0.22 | 1.66         | 0.23 | 1.31  | 0.16 | <u>1.50</u> | 0.16 | 2.51  | 0.36 | 0.85 |
| <b>Site 3</b>  | 2.30  | 0.36 | 2.25         | 0.38 | 1.35  | 0.30 | 1.39  | 0.37 | 2.11  | 0.34 | 2.03         | 0.30 | 1.35  | 0.39 | 1.41        | 0.43 | 1.41  | 0.83 | 0.69 |
| <b>Cre</b>     |       |      |              |      |       |      |       |      |       |      |              |      |       |      |             |      |       |      |      |
|                |       |      |              |      | *     |      | *     |      |       |      |              |      |       |      |             |      |       | *    |      |
| <b>Site 1</b>  | 11.78 | 1.07 | 10.79        | 0.67 | 11.36 | 1.77 | 12.21 | 1.87 | 13.17 | 1.07 | 12.24        | 1.10 | 11.04 | 2.21 | 11.58       | 1.60 | 17.07 | 2.63 | 0.74 |
| <b>Site 2</b>  | 10.23 | 0.54 | 10.38        | 1.00 | 11.23 | 0.64 | 11.42 | 0.72 | 11.17 | 0.86 | 10.83        | 0.78 | 10.75 | 1.22 | 10.86       | 1.47 | 14.91 | 1.19 | 0.84 |
| <b>Site 3</b>  | 11.44 | 1.18 | 11.63        | 1.27 | 7.81  | 1.22 | 8.32  | 1.36 | 12.93 | 1.21 | 12.91        | 1.39 | 10.13 | 1.77 | 9.93        | 1.70 | 8.68  | 4.01 | 0.69 |
| <b>Pure WM</b> |       |      |              |      |       |      |       |      |       |      |              |      |       |      |             |      |       |      |      |
| <b>NAA</b>     |       |      |              |      |       |      |       |      |       |      |              |      |       |      |             |      |       |      |      |
|                |       |      |              |      | *     |      |       |      |       |      |              |      |       |      |             |      |       | *    |      |
| <b>Site 1</b>  | 12.42 | 1.45 | 12.12        | 1.79 | 12.34 | 1.54 | 13.47 | 1.66 | 11.30 | 1.32 | 12.70        | 1.67 | 13.68 | 1.55 | 14.21       | 1.67 | 11.74 | 1.20 | 0.67 |
| <b>Site 2</b>  | 13.37 | 0.74 | 12.98        | 0.73 | 12.80 | 0.81 | 13.08 | 0.83 | 13.31 | 0.72 | 12.84        | 0.64 | 14.10 | 0.98 | 13.59       | 0.74 | 13.90 | 1.17 | 0.90 |
| <b>Site 3</b>  | 12.50 | 1.19 | 12.38        | 1.20 | 9.92  | 1.08 | 11.43 | 1.76 | 12.26 | 1.14 | 13.46        | 1.23 | 13.39 | 1.42 | 13.90       | 2.24 | 9.84  | 2.29 | 0.73 |
| <b>Cho</b>     |       |      |              |      |       |      |       |      |       |      |              |      |       |      |             |      |       |      |      |
|                |       |      |              |      | *     |      | *     |      |       |      |              |      |       |      |             |      |       | *    |      |
| <b>Site 1</b>  | 2.40  | 0.36 | 2.31         | 0.37 | 2.01  | 0.38 | 2.59  | 0.63 | 2.13  | 0.35 | 2.35         | 0.45 | 1.79  | 0.41 | 1.90        | 0.80 | 2.96  | 0.36 | 0.70 |
| <b>Site 2</b>  | 2.36  | 0.23 | 2.27         | 0.23 | 2.45  | 0.17 | 2.31  | 0.15 | 2.28  | 0.21 | 2.13         | 0.20 | 1.94  | 0.23 | 1.77        | 0.23 | 3.24  | 0.25 | 0.91 |
| <b>Site 3</b>  | 2.06  | 0.38 | 1.98         | 0.40 | 1.50  | 0.42 | 1.70  | 0.44 | 2.04  | 0.33 | 2.17         | 0.38 | 1.73  | 0.36 | 1.71        | 0.35 | 0.61  | 0.21 | 0.69 |
| <b>Cre</b>     |       |      |              |      |       |      |       |      |       |      |              |      |       |      |             |      |       |      |      |
|                |       |      |              |      |       |      |       |      |       |      |              |      |       |      |             |      |       | *    |      |
| <b>Site 1</b>  | 7.94  | 0.76 | 8.01         | 1.07 | 6.36  | 0.94 | 7.01  | 1.55 | 7.06  | 0.62 | 7.96         | 1.20 | 9.16  | 1.32 | 10.50       | 1.71 | 9.81  | 1.72 | 0.72 |
| <b>Site 2</b>  | 7.87  | 0.61 | 7.51         | 0.46 | 7.84  | 0.60 | 7.77  | 0.68 | 7.72  | 0.54 | 7.36         | 0.48 | 8.56  | 0.82 | 8.06        | 0.60 | 11.42 | 1.71 | 0.89 |
| <b>Site 3</b>  | 7.32  | 0.83 | 7.13         | 0.98 | 5.23  | 0.91 | 6.45  | 1.57 | 7.10  | 0.74 | 7.78         | 1.01 | 7.85  | 1.31 | 8.75        | 1.40 | 2.48  | 1.28 | 0.68 |

**Table S3**

Ratios of individual metabolite concentrations of each brain region with associated standard deviation (SD) averaged over the 10 normal subjects. The groups marked with an asterisk are statistically different ( $p < 0.05$ ), and the underlined numbers indicate statistically significant difference between right and left lobes for that brain region.

| Brain regions  | RFL   |       | LFL   |       | RTL   |       | LTL          |       | RPL   |       | LPL   |       | ROL    |       | LOL    |       | Cbl    |       |
|----------------|-------|-------|-------|-------|-------|-------|--------------|-------|-------|-------|-------|-------|--------|-------|--------|-------|--------|-------|
|                | Mean  | SD    | Mean  | SD    | Mean  | SD    | Mean         | SD    | Mean  | SD    | Mean  | SD    | Mean   | SD    | Mean   | SD    | Mean   | SD    |
| <b>NAA/Cre</b> |       |       |       |       | *     |       | *            |       |       |       |       |       |        |       |        |       |        | *     |
| <b>Site 1</b>  | 1.474 | 0.074 | 1.463 | 0.079 | 1.154 | 0.098 | <u>1.278</u> | 0.083 | 1.474 | 0.071 | 1.464 | 0.062 | 1.395  | 0.144 | 1.364  | 0.083 | 0.989  | 0.103 |
| <b>Site 2</b>  | 1.589 | 0.099 | 1.600 | 0.093 | 1.533 | 0.073 | 1.551        | 0.098 | 1.599 | 0.106 | 1.605 | 0.099 | 1.578  | 0.089 | 1.566  | 0.090 | 1.101  | 0.083 |
| <b>Site 3</b>  | 1.638 | 0.077 | 1.674 | 0.122 | 1.781 | 0.249 | 1.786        | 0.208 | 1.607 | 0.079 | 1.616 | 0.074 | 1.624  | 0.124 | 1.567  | 0.111 | 2.518  | 0.792 |
| <b>Cho/Cre</b> |       |       |       |       |       |       |              |       |       |       |       |       |        |       |        |       |        | *     |
| <b>Site 1</b>  | 0.254 | 0.026 | 0.248 | 0.022 | 0.219 | 0.023 | 0.228        | 0.029 | 0.225 | 0.026 | 0.223 | 0.022 | 0.165  | 0.018 | 0.173  | 0.025 | 0.245  | 0.031 |
| <b>Site 2</b>  | 0.260 | 0.031 | 0.259 | 0.031 | 0.242 | 0.027 | 0.244        | 0.030 | 0.229 | 0.028 | 0.229 | 0.024 | 0.177  | 0.021 | 0.179  | 0.023 | 0.217  | 0.023 |
| <b>Site 3</b>  | 0.242 | 0.015 | 0.235 | 0.015 | 0.214 | 0.026 | 0.208        | 0.020 | 0.223 | 0.021 | 0.219 | 0.016 | 0.166  | 0.018 | 0.158  | 0.013 | 0.173  | 0.017 |
| <b>NAA/Cho</b> |       |       |       |       | *     |       | *            |       |       |       |       |       |        |       | *      |       | *      |       |
| <b>Site 1</b>  | 6.122 | 0.692 | 6.127 | 0.576 | 5.008 | 0.706 | 5.734        | 0.835 | 6.97  | 0.882 | 6.837 | 0.767 | 9.137  | 1.638 | 8.226  | 1.363 | 4.182  | 0.412 |
| <b>Site 2</b>  | 6.262 | 0.512 | 6.388 | 0.509 | 6.558 | 0.545 | 6.657        | 0.614 | 7.277 | 0.652 | 7.382 | 0.584 | 9.209  | 0.877 | 9.075  | 0.896 | 5.228  | 0.633 |
| <b>Site 3</b>  | 7.016 | 0.526 | 7.535 | 0.944 | 8.483 | 1.899 | 9.131        | 1.623 | 7.523 | 0.535 | 7.761 | 0.467 | 10.313 | 1.485 | 10.588 | 1.030 | 13.521 | 3.766 |

**Table S4**

Ratios of metabolite ratios in pure GM and pure WM of each brain region with associated standard deviation (SD) averaged over the 10 normal subjects. The groups marked with an asterisk are statistically different ( $p < 0.05$ ), and the underlined numbers indicate statistically significant difference between right and left lobes for that brain region.

| Brain regions  | RFL   |       | LFL   |       | RTL   |       | LTL   |       | RPL   |       | LPL   |       | ROL    |       | LOL          |       | Cbl    |       |
|----------------|-------|-------|-------|-------|-------|-------|-------|-------|-------|-------|-------|-------|--------|-------|--------------|-------|--------|-------|
|                | Mean  | SD    | Mean   | SD    | Mean         | SD    | Mean   | SD    |
| <b>Pure GM</b> |       |       |       |       |       |       |       |       |       |       |       |       |        |       |              |       |        |       |
| <b>NAA/Cre</b> | *     |       | *     |       | *     |       | *     |       |       |       |       |       | *      |       |              |       |        | *     |
| <b>Site 1</b>  | 1.364 | 0.093 | 1.366 | 0.092 | 1.003 | 0.178 | 0.892 | 0.138 | 1.294 | 0.092 | 1.236 | 0.073 | 1.120  | 0.260 | 1.033        | 0.154 | 0.645  | 0.106 |
| <b>Site 2</b>  | 1.383 | 0.074 | 1.392 | 0.104 | 1.371 | 0.065 | 1.351 | 0.116 | 1.386 | 0.082 | 1.421 | 0.100 | 1.463  | 0.109 | 1.440        | 0.157 | 0.951  | 0.068 |
| <b>Site 3</b>  | 1.493 | 0.107 | 1.519 | 0.109 | 1.547 | 0.343 | 1.652 | 0.256 | 1.421 | 0.098 | 1.440 | 0.091 | 1.455  | 0.192 | 1.421        | 0.119 | 1.417  | 1.026 |
| <b>Cho/Cre</b> |       |       |       |       | *     |       | *     |       | *     |       |       |       |        |       |              |       |        |       |
| <b>Site 1</b>  | 0.202 | 0.027 | 0.198 | 0.025 | 0.137 | 0.022 | 0.128 | 0.028 | 0.126 | 0.016 | 0.121 | 0.023 | 0.120  | 0.039 | 0.119        | 0.024 | 0.156  | 0.043 |
| <b>Site 2</b>  | 0.192 | 0.023 | 0.191 | 0.030 | 0.158 | 0.019 | 0.173 | 0.027 | 0.123 | 0.024 | 0.143 | 0.026 | 0.123  | 0.021 | 0.134        | 0.021 | 0.155  | 0.028 |
| <b>Site 3</b>  | 0.193 | 0.023 | 0.187 | 0.020 | 0.153 | 0.021 | 0.160 | 0.026 | 0.143 | 0.020 | 0.146 | 0.016 | 0.122  | 0.018 | 0.140        | 0.025 | 0.142  | 0.029 |
| <b>NAA/Cho</b> |       |       |       |       | *     |       | *     |       |       |       |       |       |        |       | *            |       | *      |       |
| <b>Site 1</b>  | 6.892 | 0.765 | 6.984 | 0.804 | 6.263 | 0.625 | 5.916 | 0.838 | 8.885 | 1.176 | 8.478 | 1.264 | 10.122 | 2.616 | <u>7.937</u> | 1.554 | 4.195  | 1.006 |
| <b>Site 2</b>  | 6.985 | 0.579 | 7.257 | 0.722 | 7.786 | 0.744 | 7.696 | 1.133 | 9.326 | 0.936 | 9.209 | 0.766 | 11.333 | 1.368 | 10.441       | 0.719 | 5.915  | 0.925 |
| <b>Site 3</b>  | 7.469 | 0.693 | 8.066 | 0.983 | 8.785 | 1.818 | 9.728 | 2.209 | 8.835 | 0.717 | 9.174 | 0.712 | 10.951 | 2.473 | 10.037       | 1.827 | 10.195 | 5.948 |
| <b>Pure WM</b> |       |       |       |       |       |       |       |       |       |       |       |       |        |       |              |       |        |       |
| <b>NAA/Cre</b> |       |       |       |       | *     |       |       |       |       |       |       |       |        |       |              |       |        | *     |
| <b>Site 1</b>  | 1.579 | 0.137 | 1.553 | 0.111 | 1.507 | 0.192 | 1.546 | 0.111 | 1.603 | 0.103 | 1.627 | 0.098 | 1.626  | 0.421 | 1.663        | 0.186 | 1.251  | 0.182 |
| <b>Site 2</b>  | 1.713 | 0.147 | 1.728 | 0.114 | 1.668 | 0.102 | 1.692 | 0.113 | 1.728 | 0.143 | 1.731 | 0.114 | 1.661  | 0.105 | 1.673        | 0.108 | 1.247  | 0.168 |
| <b>Site 3</b>  | 1.680 | 0.090 | 1.715 | 0.150 | 1.898 | 0.198 | 1.766 | 0.182 | 1.704 | 0.106 | 1.680 | 0.072 | 1.694  | 0.131 | 1.638        | 0.137 | 3.399  | 0.830 |
| <b>Cho/Cre</b> |       |       |       |       |       |       |       |       |       |       |       |       |        |       |              |       |        | *     |
| <b>Site 1</b>  | 0.301 | 0.034 | 0.293 | 0.027 | 0.317 | 0.037 | 0.296 | 0.036 | 0.297 | 0.035 | 0.297 | 0.030 | 0.196  | 0.031 | 0.223        | 0.044 | 0.313  | 0.056 |
| <b>Site 2</b>  | 0.302 | 0.044 | 0.301 | 0.038 | 0.314 | 0.041 | 0.297 | 0.040 | 0.295 | 0.038 | 0.287 | 0.029 | 0.226  | 0.031 | 0.217        | 0.037 | 0.280  | 0.035 |
| <b>Site 3</b>  | 0.280 | 0.026 | 0.275 | 0.020 | 0.279 | 0.042 | 0.262 | 0.026 | 0.289 | 0.033 | 0.276 | 0.026 | 0.215  | 0.029 | <u>0.182</u> | 0.025 | 0.199  | 0.016 |
| <b>NAA/Cho</b> |       |       |       |       | *     |       | *     |       |       |       |       |       |        |       |              |       |        | *     |
| <b>Site 1</b>  | 5.457 | 0.812 | 5.520 | 0.531 | 4.990 | 0.838 | 5.631 | 0.944 | 5.614 | 0.779 | 5.676 | 0.560 | 8.611  | 2.497 | 8.416        | 2.376 | 4.168  | 0.465 |
| <b>Site 2</b>  | 5.817 | 0.593 | 5.846 | 0.507 | 5.513 | 0.555 | 5.844 | 0.556 | 6.035 | 0.598 | 6.161 | 0.642 | 7.610  | 1.096 | 7.935        | 1.403 | 4.515  | 0.593 |
| <b>Site 3</b>  | 6.167 | 0.649 | 6.473 | 1.039 | 7.366 | 2.268 | 7.194 | 1.222 | 6.048 | 0.650 | 6.170 | 0.600 | 8.369  | 1.204 | <u>9.711</u> | 1.533 | 15.703 | 3.188 |
